# Supplementary material for: New insight into hybridization and unidirectional introgression between Ammodytes japonicus and Ammodytes heian (Trachiniformes, Ammodytidae)
Source: PLoS One. 2017 Jun 5;12(6):e0178001. doi: 10.1371/journal.pone.0178001 (PMC5459329; doi:10.1371/journal.pone.0178001)
Supplement: S1 Table — (XLSX) [file pone.0178001.s001.xlsx]

## Sheet: Sheet1
	BA_S	TO_S	GI_N	GI_S	JU_N	JU_S	JP_N	JP_S
BA_S		-	+	-	+	-	+	+
TO_S	0.0041		-	-	-	-	+	+
GI_N	0.0092	0.0064		-	-	-	+	+
GI_S	0.0226	0.0205	0.0092		-	-	+	+
JU_N	0.0085	0.0031	0.0016	0.0192		-	+	+
JU_S	0.0268	0.0193	0.0105	0.0302	0.0187		+	+
JP_N	0.0596	0.0603	0.0553	0.071	0.0541	0.0746		-
JP_S	0.0695	0.0714	0.0571	0.0802	0.0623	0.0821	0.0038
